# Supplementary material
Source: Springer Nature journal article supplement (https://www.springermedizin.de/resource/supplementary/13075_2010_2902_MOESM12_ESM.pdf/9693146)

Figure 6

(E)

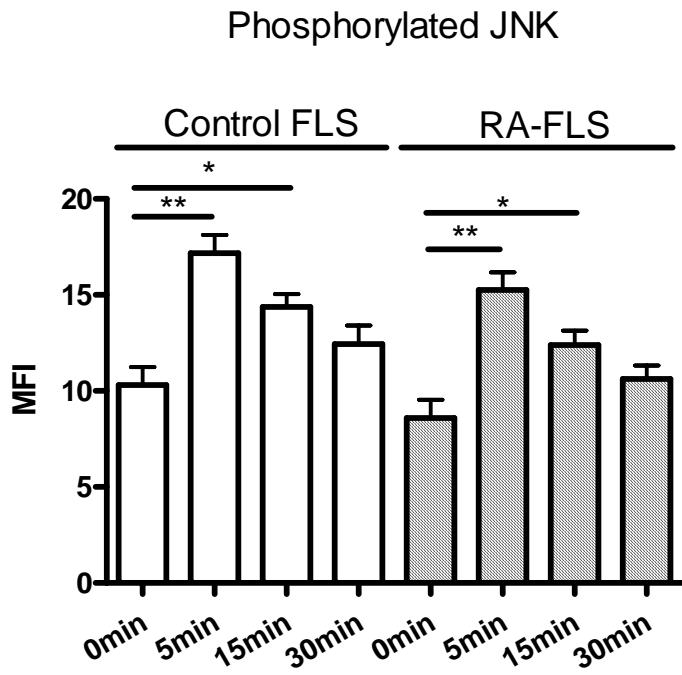

Phosphorylated JNK in control FLS

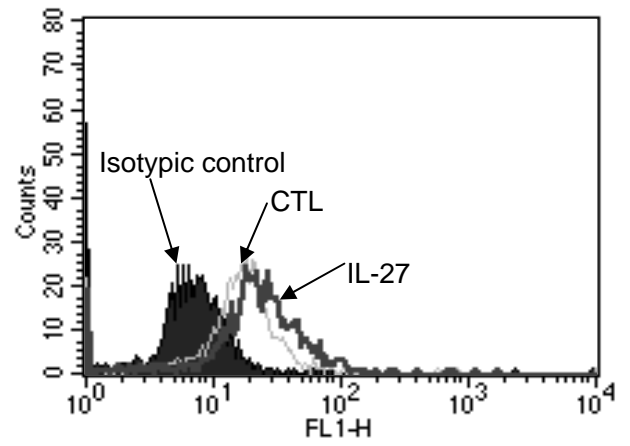

Phosphorylated JNK in RA-FLS

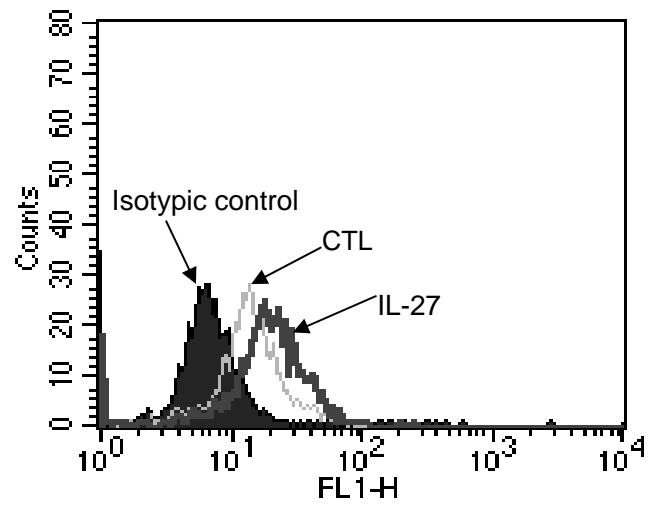

Supplement: MOESM12 [file 9693146]
